# Supplementary material
Source: HighWire-hosted journal article supplement (https://jitc.bmj.com/content/8/1/e000328)
Supplement: inline-supplementary-material-1 [file inline-supplementary-material-1.pdf]

## Supplemental Equations

Analytical expressions of  $S_{in}$  and  $S_{ex}$  acquired by OGSE and PGSE sequences

$$S_{in}(OGSE) = \exp\left(-2(\gamma g)^2 \sum_n \frac{B_n \lambda_n^2 D_{in}^2}{(\lambda_n^2 D_{in}^2 + 4\pi^2 f^2)^2} \left\{ \frac{(\lambda_n^2 D_{in}^2 + 4\pi^2 f^2)}{\lambda_n D_{in}} \left[ \frac{\delta}{2} + \frac{\sin(4\pi f \delta)}{8\pi f} \right] - 1 + \exp(-\lambda_n D_{in} \delta) + \exp(-\lambda_n D_{in} \Delta) (1 - \cosh(\lambda_n D_{in} \delta)) \right\}\right)$$

$$S_{in}(PGSE) = \exp\left(-2\left(\frac{\gamma g}{D_{in}}\right)^2 \sum_n \frac{B_n}{\lambda_n^2} \{\lambda_n D_{in} \delta - 1 + \exp(-\lambda_n D_{in} \delta) + \exp(-\lambda_n D_{in} \Delta) (1 - \cosh(\lambda_n D_{in} \delta))\}\right)$$

$$S_{ex}(\text{either PGSE or OGSE}) = \exp[-bD_{ex}]$$

where  $D_{in}$  is the intracellular diffusion coefficient,  $f$  is the oscillation frequency,  $\delta$  is the gradient duration,  $\Delta$  is the separation of two diffusion gradients,  $g$  is the gradient amplitude, and  $\lambda_n$  and  $B_n$  are structure dependent parameters that depend on the spherical cell diameter  $d$ ,  $D_{ex}$  is the extracellular diffusion rate at frequencies close to 0. Explicit expressions for  $\lambda_n$  and  $B_n$  have been reported previously (15).

## Supplemental Figures

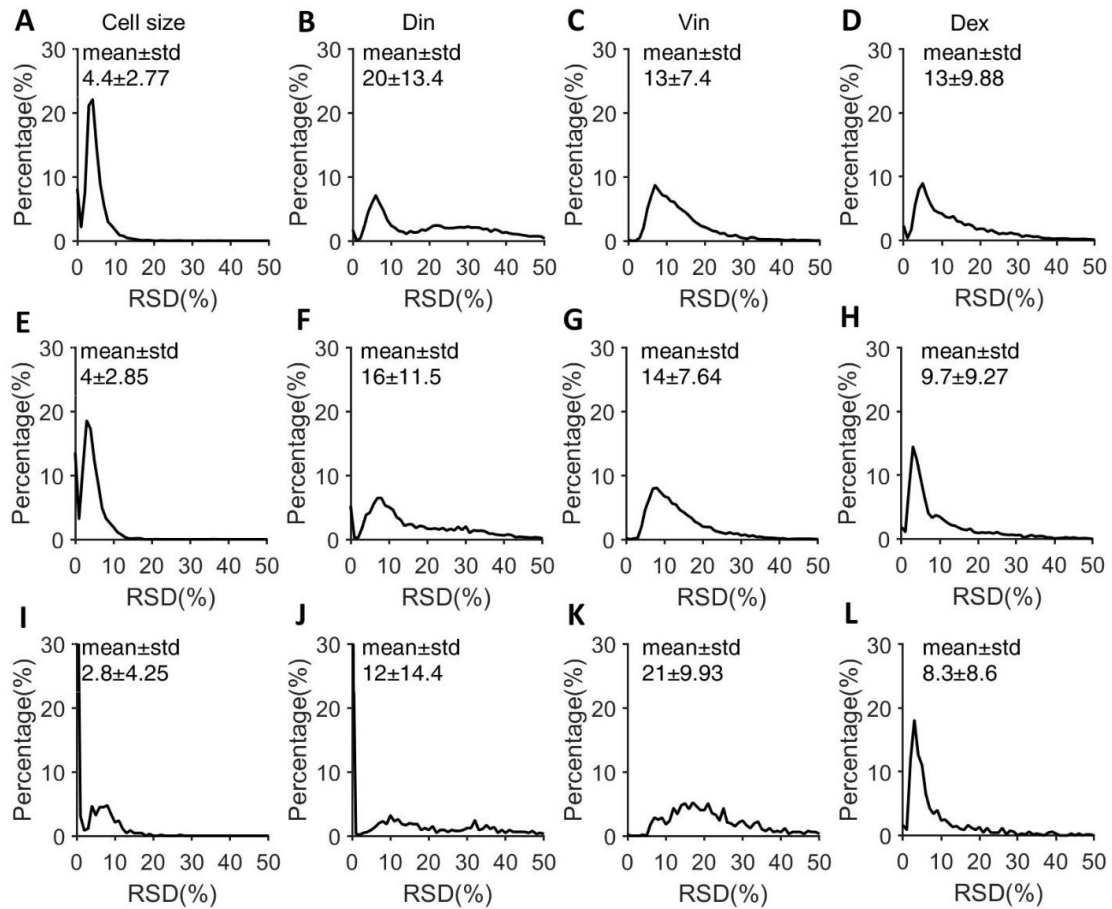

Supplemental Figure 1. Histograms of RSD of IMPULSED-derived cell size, intracellular volume fraction, and intracellular/extracellular diffusion coefficients, for representative control IgG-treated, ICB non-responder, and ICB responder tumors, respectively, at 16 DPI.

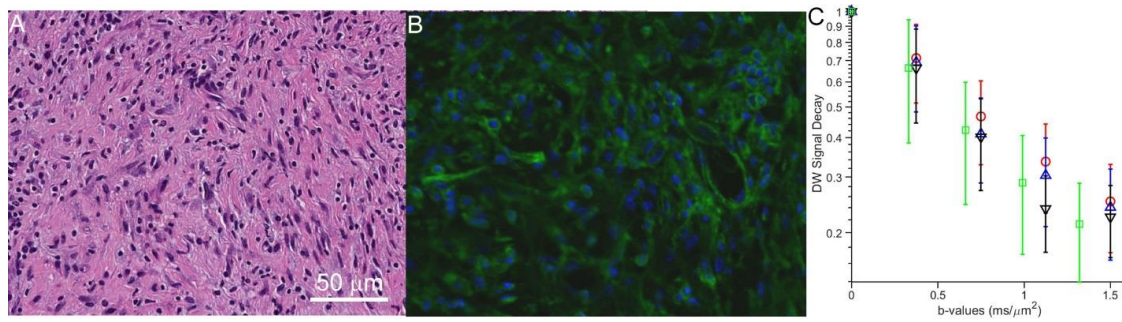

Supplemental Figure 2. Representative H&E (A) and Na<sup>+</sup>/K<sup>+</sup>-ATPase (B) stained pictures for a dual immunotherapy treated MC38 tumor which underwent significant late-stage apoptosis/necrosis. (C) Normalized diffusion-weighted signals (mean  $\pm$  std) for the same tumor.

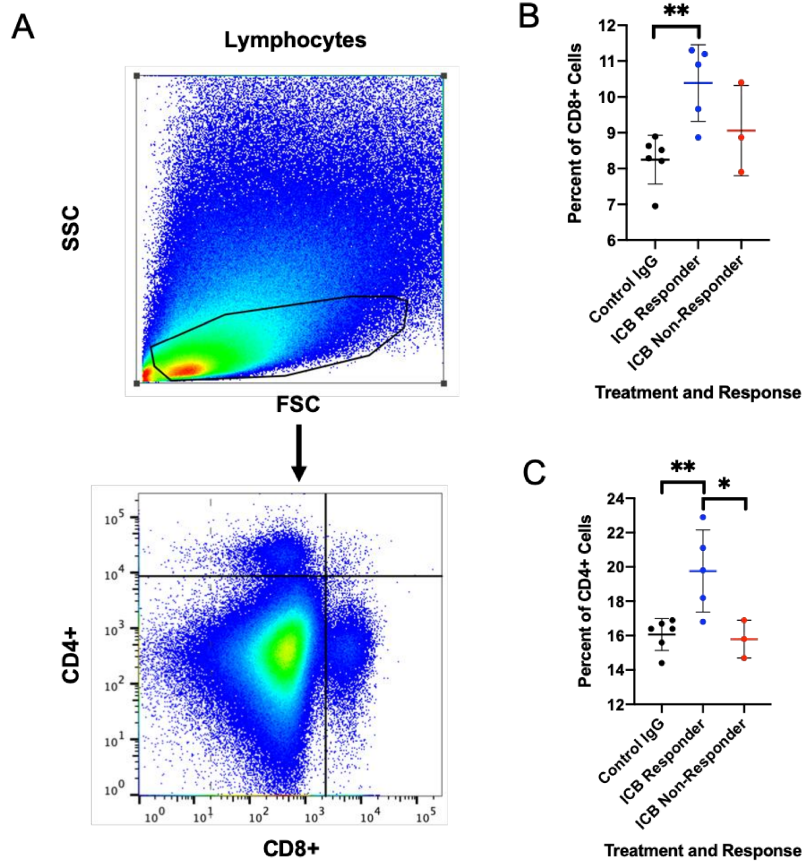

Supplemental Figure 3. Cells were first gated by forward and side scatter for lymphocytes. Then, cells were subtyped into CD8+ and CD4+ T cells(A). ICB responders had a significantly higher percent of splenic CD8+ T cells than Control IgG treated mice (B). CD4+ splenic T cells from ICB responder also had a significantly higher percent compared to control IgG-treated and ICB non-responder spleens (C). \* $P < 0.05$  and \*\* $P < 0.01$  as measured by ordinary one-way ANOVA for (B) and (C).

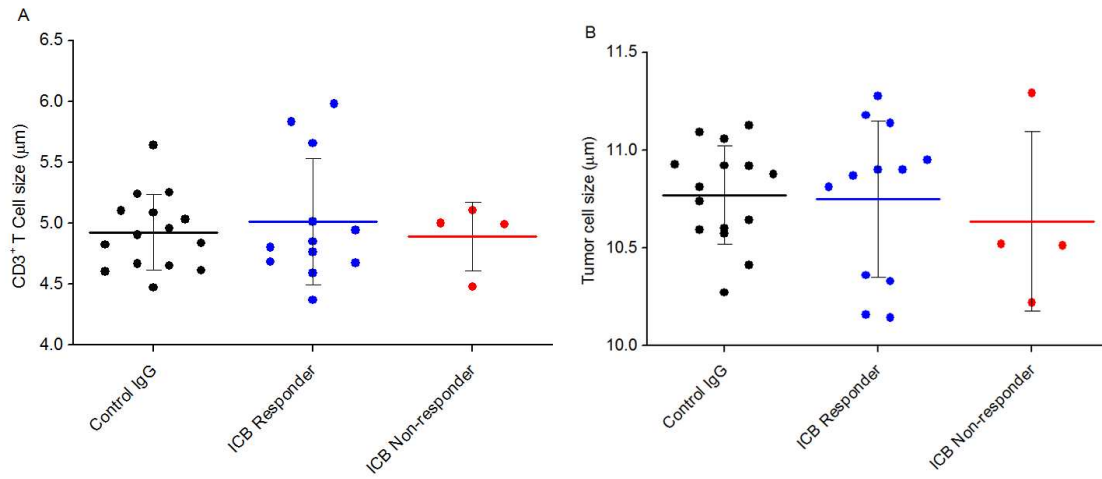

Supplemental Figure 4. Histology-derived cell sizes of CD3<sup>+</sup> T cells (A) and tumor cells (B) for control IgG (black), ICB responder (blue), and ICB Non-responder (red) tumors.
